# Supplementary material for: Translational Potential of Fluorescence Polarization for Breast Cancer Cytopathology
Source: MDPI journal article supplement (doi:10.3390/cancers15051501), 2023-02-27
Supplement: s1 [file s1]

*Supplementary Information for*

# **Translational Potential of Fluorescence Polarization for Breast Cancer Cytopathology**

**Peter R. Jermain<sup>1,2</sup>, Dina H. Kandil<sup>3</sup>, Alona Muzikansky<sup>4</sup>, Ashraf Khan<sup>5</sup>, and Anna N. Yaroslavsky<sup>1,6,\*</sup>**

<sup>1</sup>Advanced Biophotonics Laboratory, University of Massachusetts Lowell; Lowell, MA 01854, USA.

<sup>2</sup>Department of Radiation Oncology, Massachusetts General Hospital, Boston, MA 02114, USA.

<sup>3</sup>Department of Pathology, UMass Chan Medical School; Worcester, MA 01655, USA.

<sup>4</sup>Biostatistics Center, Massachusetts General Hospital; Boston, MA 02114, USA.

<sup>5</sup>Department of Pathology, UMass Chan Medical School-Baystate; Baystate Health, Springfield, MA 01199, USA.

<sup>6</sup>Department of Dermatology, Massachusetts General Hospital; Boston, MA 02114, USA.

\* Correspondence: [ayaroslavsky@mg.harvard.edu](mailto:ayaroslavsky@mg.harvard.edu); Tel.: 1-978-934-3766

**This PDF file includes:**

**Supplementary Table S1:** Clinical information and fluorescence polarization (Fpol) characteristics of 44 breast fine needle aspiration specimens.

Supplementary Table S1. Clinical information and fluorescence polarization (Fpol) characteristics of 44 breast fine needle aspiration specimens.

| Subject No. | Age | Tumor dimensions (cm)         | Diagnosis, grade | Molecular subtype (ER/PR/HER2) | Surgical treatment | No. of cells analyzed | Mean Fpol $\pm$ SD ( $\times 10^{-2}$ ) | Fpol range ( $\times 10^{-2}$ ) | No. of cells with Fpol > 23.3 ( $\times 10^{-2}$ ) (%) |
|-------------|-----|-------------------------------|------------------|--------------------------------|--------------------|-----------------------|-----------------------------------------|---------------------------------|--------------------------------------------------------|
| 1-M         | 60  | 1.2 $\times$ 1.0 $\times$ 0.5 | IDC, 1           | ER+/PR+/HER2-                  | Partial mastectomy | 122                   | 24.3 $\pm$ 1.7                          | 20.9 – 27.5                     | 91 (75)                                                |
| 2-M         | 69  | 0.9 $\times$ 0.7 $\times$ 0.5 | IDC, 2           | ER+/PR+/HER2+                  | Partial mastectomy | 211                   | 24.5 $\pm$ 1.4                          | 22.0 – 28.5                     | 159 (75)                                               |
| 3-M         | 46  | 1.8 $\times$ 1.3              | IDC, 2           | ER+/PR+/HER2-                  | Partial mastectomy | 88                    | 24.7 $\pm$ 1.9                          | 22.0 – 28.6                     | 77 (88)                                                |
| 4-M         | 72  | 1.1 $\times$ 1.0 $\times$ 0.6 | IDC, DCIS, 2     | ER+/PR+/HER2-                  | Mastectomy         | 103                   | 24.6 $\pm$ 1.3                          | 20.7 – 28.3                     | 92 (89)                                                |
| 5-M1        | 68  | 0.9 $\times$ 0.8 $\times$ 0.6 | IDC, DCIS, 2     | ER+/PR+/HER2-                  | Mastectomy         | 51                    | 24.4 $\pm$ 1.6                          | 21.9 – 28.2                     | 33 (65)                                                |
| 5-M2        | 68  | 0.9 $\times$ 0.8 $\times$ 0.6 | IDC, DCIS, 2     | ER+/PR+/HER2-                  | Mastectomy         | 66                    | 24.7 $\pm$ 1.8                          | 21.9 – 28.5                     | 49 (74)                                                |
| 6-M         | 57  | 2.2 $\times$ 1.4              | IDC, DCIS, 2     | ER+/PR+/HER2-                  | Partial mastectomy | 55                    | 24.5 $\pm$ 1.7                          | 20.9 – 29.6                     | 38 (69)                                                |
| 7-M         | 44  | 2.2 $\times$ 2.0 $\times$ 1.5 | IDC, DCIS, 2     | ER+/PR+/HER2-                  | Mastectomy         | 117                   | 24.4 $\pm$ 1.4                          | 20.5 – 28.0                     | 85 (73)                                                |
| 8-M         | 61  | 1.8 $\times$ 1.3 $\times$ 0.8 | IDC, DCIS, 2     | ER+/PR-/HER2-                  | Partial mastectomy | 50                    | 23.8 $\pm$ 1.7                          | 21.6 – 29.9                     | 26 (52)                                                |
| 9-M         | 71  | 1.5 $\times$ 1.0 $\times$ 0.7 | IDC, DCIS, 2     | ER-/PR-/HER2-                  | Partial mastectomy | 46                    | 23.9 $\pm$ 1.1                          | 20.1 – 27.8                     | 31 (67)                                                |
| 10-M        | 61  | 1.5 $\times$ 1.0 $\times$ 0.7 | IDC, 3           | ER+/PR+/HER2-                  | Partial mastectomy | 89                    | 24.5 $\pm$ 1.0                          | 22.2 – 27.9                     | 78 (88)                                                |
| 11-M        | 80  | 1.6 $\times$ 1.6 $\times$ 1.2 | IDC, DCIS, 3     | ER+/PR+/HER2-                  | Partial mastectomy | 103                   | 24.2 $\pm$ 1.0                          | 22.0 – 26.8                     | 80 (78)                                                |
| 12-M        | 69  | 2.3                           | IDC, 3           | ER-/PR-/HER2+                  | Partial mastectomy | 57                    | 24.1 $\pm$ 2.1                          | 17.6 – 29.5                     | 36 (63)                                                |
| 13-M        | 52  | 4.2 $\times$ 3.5 $\times$ 2.8 | IDC, DCIS, 3     | ER-/PR-/HER2-                  | Mastectomy         | 117                   | 23.9 $\pm$ 1.6                          | 20.4 – 29.5                     | 69 (59)                                                |
| 14-M        | 72  | 0.7 $\times$ 0.5 $\times$ 0.4 | IDC, DCIS, 3     | ER-/PR-/HER2-                  | Partial mastectomy | 60                    | 24.9 $\pm$ 1.5                          | 22.4 – 29.0                     | 49 (82)                                                |
| 15-M        | 75  | 3.0 $\times$ 2.7 $\times$ 2.0 | ILC, LCIS, 1     | ER+/PR+/HER2-                  | Partial mastectomy | 63                    | 23.7 $\pm$ 1.2                          | 21.4 – 26.5                     | 38 (60)                                                |
| 16-M        | 69  | 1.6 $\times$ 1.5              | ILC, LCIS, 2     | ER+/PR+/HER2-                  | Mastectomy         | 41                    | 24.0 $\pm$ 1.1                          | 20.8 – 31.4                     | 21 (51)                                                |
| 17-M        | 79  | 3.0 $\times$ 2.7 $\times$ 2.0 | ILC, LCIS, 2     | ER+/PR+/HER2-                  | Partial mastectomy | 62                    | 23.9 $\pm$ 1.5                          | 21.2 – 28.0                     | 32 (52)                                                |
| 18-M        | 60  | 1.3 $\times$ 1.2 $\times$ 0.9 | ILC, LCIS, 2     | ER+/PR+/HER2-                  | Partial mastectomy | 76                    | 24.4 $\pm$ 1.8                          | 22.2 – 29.6                     | 64 (84)                                                |
| 19-B        | 21  | 4.0                           | FA               | n/a                            | Partial mastectomy | 64                    | 19.8 $\pm$ 2.2                          | 15.0 – 23.3                     | 0 (0)                                                  |
| 20-B        | 54  | 0.6                           | FA               | n/a                            | Partial mastectomy | 117                   | 19.5 $\pm$ 1.0                          | 17.5 – 23.0                     | 0 (0)                                                  |
| 21-B        | 25  | 2.6 $\times$ 1.9 $\times$ 1.5 | FA               | n/a                            | Partial mastectomy | 113                   | 19.1 $\pm$ 1.7                          | 15.6 – 22.9                     | 0 (0)                                                  |
| 22-B        | 33  | 10.0                          | FA               | n/a                            | Partial mastectomy | 188                   | 19.2 $\pm$ 1.4                          | 16.4 – 22.7                     | 0 (0)                                                  |
| 23-B1       | 20  | 2.7                           | FA               | n/a                            | Partial mastectomy | 79                    | 19.9 $\pm$ 1.3                          | 15.1 – 22.6                     | 0 (0)                                                  |
| 23-B2       | 20  | 2.6                           | FA               | n/a                            | Partial mastectomy | 71                    | 19.7 $\pm$ 0.9                          | 17.4 – 21.7                     | 0 (0)                                                  |
| 24-B        | 87  | 3.3                           | IDP              | n/a                            | Partial mastectomy | 30                    | 19.0 $\pm$ 1.0                          | 16.5 – 20.9                     | 0 (0)                                                  |
| 25-B        | 34  | 2.3                           | IDP              | n/a                            | Partial mastectomy | 37                    | 18.7 $\pm$ 1.3                          | 15.6 – 21.5                     | 0 (0)                                                  |
| 26-B        | 47  | 1.0                           | IDP              | n/a                            | Partial mastectomy | 97                    | 18.8 $\pm$ 1.5                          | 16.2 – 23.0                     | 0 (0)                                                  |
| 27-B        | 54  | 1.2                           | IDP              | n/a                            | Partial mastectomy | 114                   | 19.1 $\pm$ 1.4                          | 15.0 – 23.0                     | 0 (0)                                                  |
| 1-N         | 60  | n/a                           | N                | n/a                            | Partial mastectomy | 147                   | 18.1 $\pm$ 1.7                          | 15.0 – 21.6                     | 0 (0)                                                  |
| 2-N         | 69  | n/a                           | N                | n/a                            | Partial mastectomy | 274                   | 18.7 $\pm$ 1.7                          | 14.6 – 22.1                     | 0 (0)                                                  |
| 4-N         | 72  | n/a                           | N                | n/a                            | Mastectomy         | 47                    | 19.2 $\pm$ 1.6                          | 15.6 – 22.1                     | 0 (0)                                                  |
| 5-N         | 68  | n/a                           | N                | n/a                            | Mastectomy         | 92                    | 19.3 $\pm$ 1.3                          | 16.4 – 22.1                     | 0 (0)                                                  |
| 6-N         | 57  | n/a                           | N                | n/a                            | Partial mastectomy | 47                    | 20.1 $\pm$ 1.7                          | 15.2 – 23.2                     | 0 (0)                                                  |
| 7-N         | 44  | n/a                           | N                | n/a                            | Mastectomy         | 43                    | 18.8 $\pm$ 1.2                          | 16.1 – 21.0                     | 0 (0)                                                  |
| 8-N         | 61  | n/a                           | N                | n/a                            | Partial mastectomy | 48                    | 19.9 $\pm$ 1.1                          | 17.2 – 22.0                     | 0 (0)                                                  |
| 9-N         | 71  | n/a                           | N                | n/a                            | Partial mastectomy | 40                    | 19.6 $\pm$ 1.0                          | 18.0 – 21.9                     | 0 (0)                                                  |
| 11-N        | 80  | n/a                           | N                | n/a                            | Partial mastectomy | 147                   | 18.4 $\pm$ 1.6                          | 14.4 – 21.3                     | 0 (0)                                                  |
| 15-N        | 75  | n/a                           | N                | n/a                            | Partial mastectomy | 37                    | 19.7 $\pm$ 1.3                          | 18.1 – 21.9                     | 0 (0)                                                  |
| 17-N        | 79  | n/a                           | N                | n/a                            | Partial mastectomy | 35                    | 19.8 $\pm$ 1.6                          | 14.0 – 21.8                     | 0 (0)                                                  |
| 18-N        | 60  | n/a                           | N                | n/a                            | Partial mastectomy | 131                   | 18.9 $\pm$ 1.4                          | 15.1 – 22.2                     | 0 (0)                                                  |
| 20-N        | 54  | n/a                           | N                | n/a                            | Partial mastectomy | 55                    | 17.6 $\pm$ 1.0                          | 15.7 – 20.3                     | 0 (0)                                                  |
| 25-N        | 34  | n/a                           | N                | n/a                            | Partial mastectomy | 28                    | 19.3 $\pm$ 1.6                          | 16.3 – 21.0                     | 0 (0)                                                  |
| 28-N        | 51  | n/a                           | N                | n/a                            | Partial mastectomy | 150                   | 19.5 $\pm$ 1.6                          | 15.7 – 23.2                     | 0 (0)                                                  |

M – malignant, B – benign, N – normal, ER – estrogen receptor, PR – progesterone receptor, HER2 – human epidermal growth factor receptor 2, IDC – invasive ductal carcinoma, ILC – invasive lobular carcinoma, DCIS – ductal carcinoma in situ, LCIS – lobular carcinoma in situ, FA – fibroadenoma, IDP – intraductal papilloma, SD – standard deviation.
